# Supplementary material
Source: MDPI journal article supplement (https://www.mdpi.com/2073-4395/12/12/3015)
Supplement: s1 [file s1]

# Supplementary Information

Table S1 Physical and chemical properties of the soil used in this study

| Clay | Silt | Sand | pH  | EC                        | OC                     | TN                     | C/N  | Olsen-P                 | Available K             |
|------|------|------|-----|---------------------------|------------------------|------------------------|------|-------------------------|-------------------------|
| (%)  | (%)  | (%)  |     | ( $\mu\text{S cm}^{-1}$ ) | ( $\text{g kg}^{-1}$ ) | ( $\text{g kg}^{-1}$ ) |      | ( $\text{mg kg}^{-1}$ ) | ( $\text{mg kg}^{-1}$ ) |
| 11.2 | 58.5 | 30.3 | 4.8 | 94.4                      | 26.6                   | 2.42                   | 11.0 | 44.9                    | 80.0                    |

Table S2 Chemical composition of the mineral soil amendment used in the present study

| Element                        | Content % | Element                        | Content % |
|--------------------------------|-----------|--------------------------------|-----------|
| Ca                             | 53.7      | Si                             | 18.4      |
| Al                             | 7.85      | K                              | 6.50      |
| Fe                             | 5.66      | Mg                             | 1.49      |
| CaO                            | 41.7      | SiO <sub>2</sub>               | 27.8      |
| Al <sub>2</sub> O <sub>3</sub> | 11.0      | SO <sub>3</sub>                | 6.13      |
| K <sub>2</sub> O               | 4.72      | Fe <sub>2</sub> O <sub>3</sub> | 3.90      |
| MgO                            | 1.87      | P <sub>2</sub> O <sub>5</sub>  | 1.46      |
